# Supplementary material for: Two in one: use of azide functionality for controlled photo-crosslinking and click-modification of polymer microspheres
Source: Royal Society of Chemistry journal article supplement (doi:10.1039/c6py00937a), 2016-01-01
Supplement: c6py00937a1.pdf [file c6py00937a1.pdf]

—Supporting Information—

## Two in One: Use of Azide Functionality for Controlled Photo-crosslinking and Click-modification of Polymer Microspheres

*Marco Albuszis,<sup>†</sup> Peter. J. Roth,<sup>‡,\*</sup> Werner Pauer,<sup>†,\*</sup> and Hans-Ulrich Moritz<sup>†,\*</sup>*

<sup>†</sup> Institute for Technical and Macromolecular Chemistry, University of Hamburg, Bundesstraße 45, 20146 Hamburg, Germany

<sup>‡</sup> Department of Chemistry, Faculty of Engineering and Physical Sciences, University of Surrey, Guildford, Surrey, GU2 7XH, United Kingdom

### Corresponding Author Email Addresses:

P. J. Roth (p.roth@surrey.ac.uk)

W. Pauer (pauer@chemie.uni-hamburg.de)

H.-U. Moritz (moritzhu@chemie.uni-hamburg.de)

## Synthesis of Chloromethyl-functional Microspheres

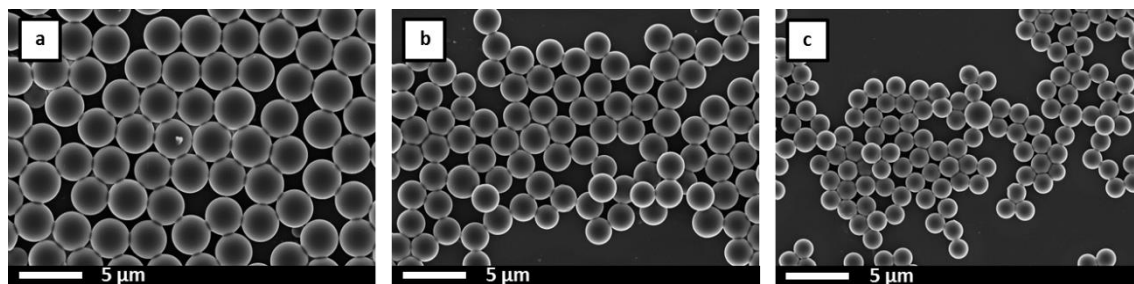

**Figure S1.** SEM images of 4-vinylbenzyl chloride (VBC)-functional microspheres with VBC feed contents of (a) 10 wt-%; (b) 50 wt-%; (c) 100 wt-% showing well-defined microspheres.

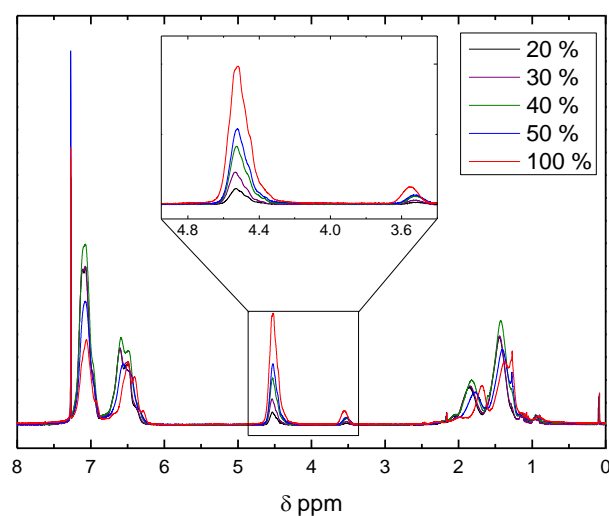

**Figure S2.**  $^1\text{H}$  NMR spectra of microspheres (dissolved in  $\text{CDCl}_3$ ) containing 4-vinylbenzyl chloride in varying amounts (20, 30, 40, 50, 100 wt-%).  $\delta/\text{ppm} = 7.30\text{--}6.20$  (Ar- $H$ ); 4.51 ( $-\text{CH}_2\text{Cl}$ ); 3.51 ( $-\text{CH}_2\text{OEt}$ ); 2.10–0.90 (backbone).

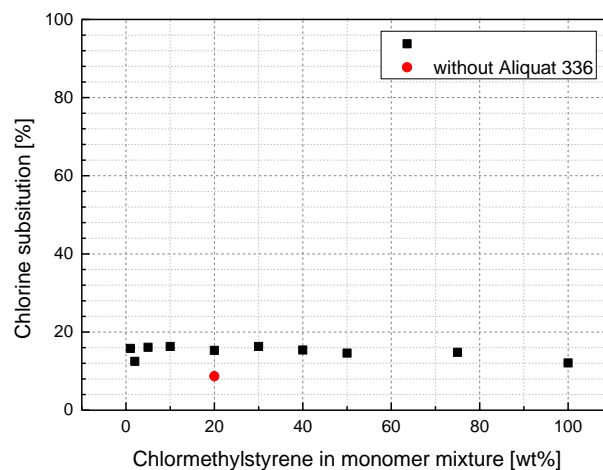

**Figure S3.** Degree of chlorine substitution by ethanol for different 4-vinylbenzyl chloride contents in poly(styrene-*co*-4-vinylbenzyl chloride) microspheres.

## Azidomethyl-functional Microsphere Characterization

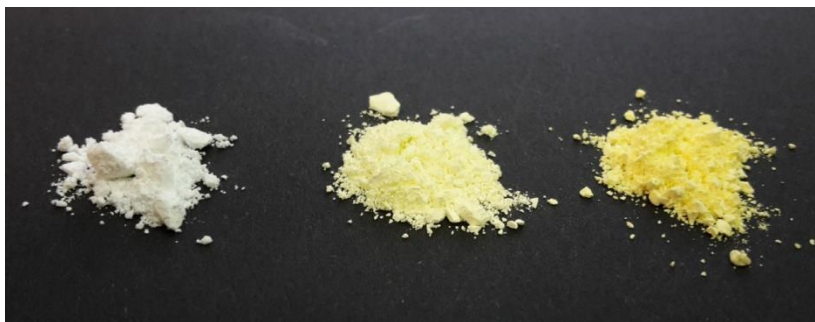

**Figure S4.** Photographs of microsphere samples MS<sub>1</sub> (left), MS<sub>50</sub> (middle), and MS<sub>100</sub> (right) showing powders of white to yellow color depending on VBA content.

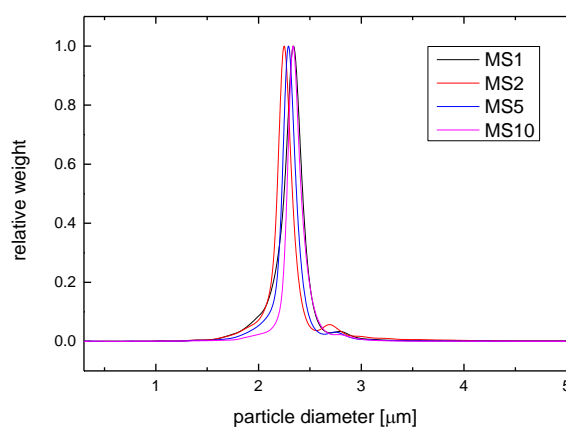

**Figure S5.** Disc centrifuge results of samples MS<sub>1</sub> (black), MS<sub>2</sub> (red), MS<sub>5</sub> (blue), and MS<sub>10</sub> (pink) giving particle diameters around 2.5 μm.

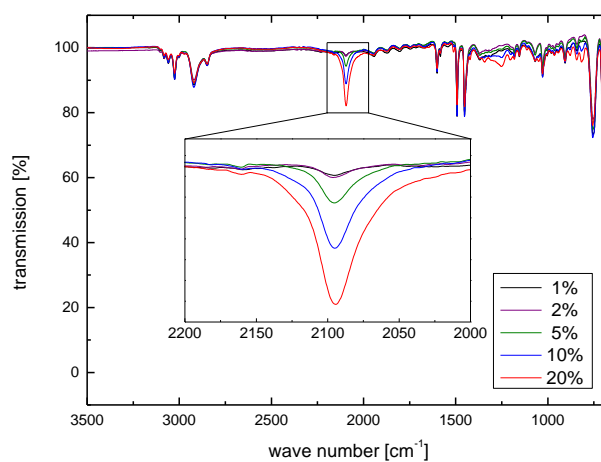

**Figure S6.** IR spectra of P(S-*co*-VBA) microspheres with VBA feed ranging from 1–20 wt-% with the N=N=N asymmetric stretch band inset

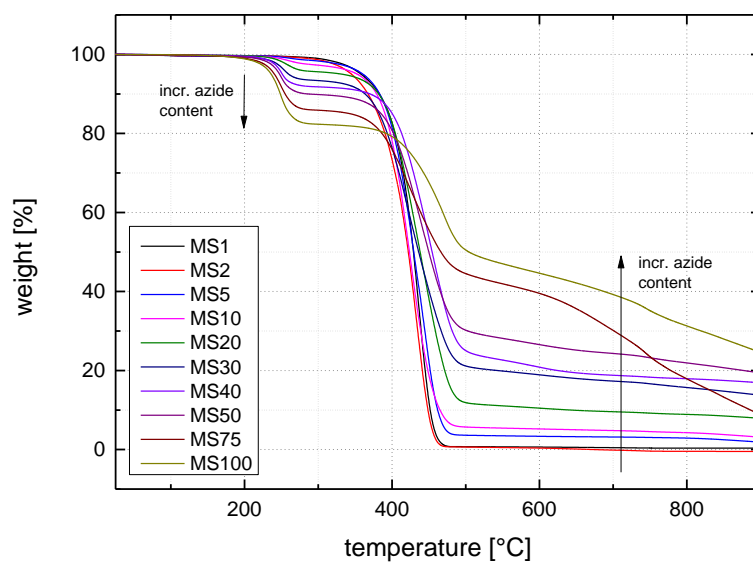

**Figure S7.** Thermogravimetric analysis of azide-functional microspheres showing the azide-to-nitrene reaction around 250 °C and the decomposition of the polymer material as of ~ 350 °C.

## Photo-crosslinking

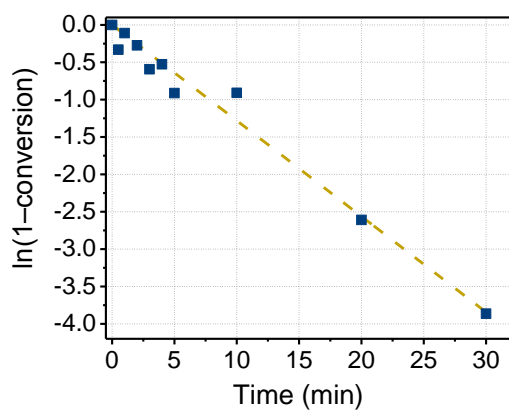

**Figure S8.** First order kinetic fit of the IR-determined azide conversion during the irradiation of sample MS<sub>100</sub>.

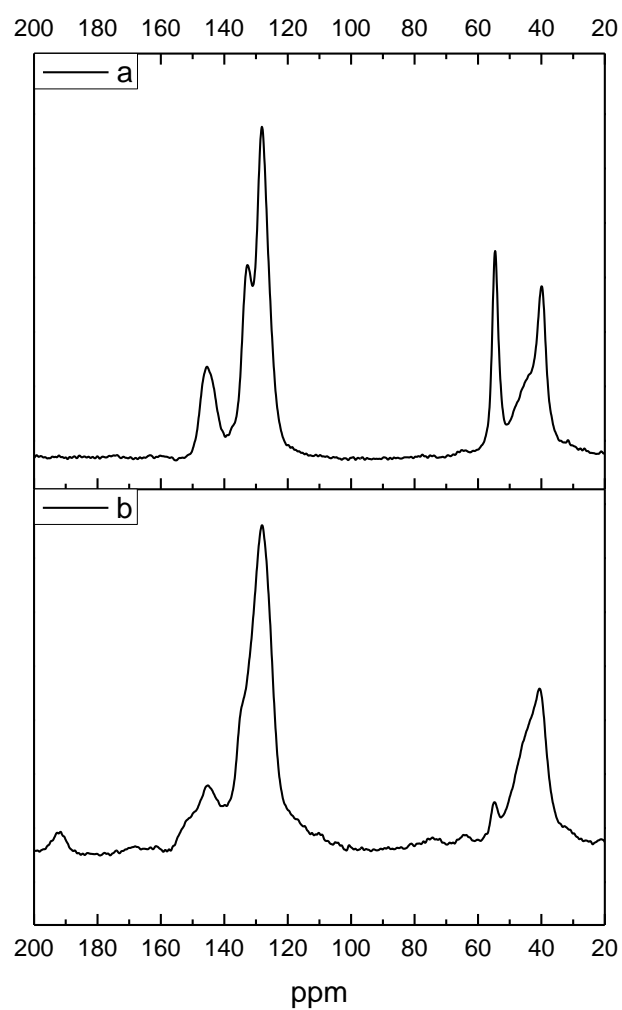

**Figure S9.**  $^{13}\text{C}$  solid state NMR spectra of microspheres  $\text{MS}_{100}$  before (top) and after (bottom) exhaustive photo-crosslinking.
